RESEARCH ARTICLE

# Codon-Optimized NADH Oxidase Gene Expression and Gene Fusion with Glycerol Dehydrogenase for Bienzyme System with Cofactor Regeneration

Baishan Fang<sup>1,2,3</sup>✉, Wei Jiang<sup>1,2</sup>✉, Qiang Zhou<sup>1,2</sup>, Shizhen Wang<sup>1,2\*</sup>

**1** Department of Chemical and Biochemical Engineering, College of Chemistry and Chemical Engineering, Xiamen University, Xiamen, 361005, China, **2** The Key Lab for Synthetic Biotechnology of Xiamen City, Xiamen University, Xiamen, 361005, China, **3** The Key Laboratory for Chemical Biology of Fujian Province, Xiamen University, Xiamen, Fujian, 361005, China

✉ These authors contributed equally to this work.

\* [szwang@xmu.edu.cn](mailto:szwang@xmu.edu.cn)

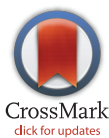

OPEN ACCESS

**Citation:** Fang B, Jiang W, Zhou Q, Wang S (2015) Codon-Optimized NADH Oxidase Gene Expression and Gene Fusion with Glycerol Dehydrogenase for Bienzyme System with Cofactor Regeneration. PLoS ONE 10(6): e0128412. doi:10.1371/journal.pone.0128412

**Editor:** Matthew A Perugini, La Trobe University, AUSTRALIA

**Received:** January 28, 2015

**Accepted:** April 27, 2015

**Published:** June 26, 2015

**Copyright:** © 2015 Fang et al. This is an open access article distributed under the terms of the [Creative Commons Attribution License](https://creativecommons.org/licenses/by/4.0/), which permits unrestricted use, distribution, and reproduction in any medium, provided the original author and source are credited.

**Data Availability Statement:** All relevant data are within the paper.

**Funding:** This work was supported by the National Natural Science Foundation of China (No. 41176111, No. 41306124), the State Key Program of the National Natural Science Foundation of China (No. 21336009), and the Fundamental Research Funds for the Central Universities (No. 2013121029). The funders had no role in study design, data collection and analysis, decision to publish, or preparation of the manuscript.

## Abstract

NADH oxidases (NOXs) play an important role in maintaining balance of NAD<sup>+</sup>/NADH by catalyzing cofactors regeneration. The expression of *nox* gene from *Lactobacillus brevis* in *Escherichia coli* BL21 (BL21 (DE3)) was studied. Two strategies, the high AT-content in the region adjacent to the initiation codon and codon usage of the whole gene sequence consistent with the host, obtained the NOX activity of 59.9 U/mg and 73.3 U/mg (crude enzyme), with enhanced expression level of 2.0 and 2.5-folds, respectively. Purified NOX activity was 213.8 U/mg. Gene fusion of glycerol dehydrogenase (GDH) and NOX formed bifunctional multi-enzymes for bioconversion of glycerol coupled with coenzyme regeneration. Kinetic parameters of the GDH-NOX for each substrate, glycerol and NADH, were calculated as  $V_{\max(\text{Glycerol})}$  20  $\mu\text{M}/\text{min}$ ,  $K_m(\text{Glycerol})$  19.4 mM,  $V_{\max(\text{NADH})}$  12.5  $\mu\text{M}/\text{min}$  and  $K_m(\text{NADH})$  51.3  $\mu\text{M}$ , respectively, which indicated the potential application of GDH-NOX for quick glycerol analysis and dioxyacetone biosynthesis.

## Introduction

NADH oxidases (NOX) catalyzes the oxidation of NADH to yield NAD<sup>+</sup> and H<sub>2</sub>O or H<sub>2</sub>O<sub>2</sub>. NOXs play a key role in maintaining the balance of NAD<sup>+</sup>/NADH by regenerating coenzyme [1–5]. There are two kinds of NOXs, corresponding to H<sub>2</sub>O<sub>2</sub>-forming (NOX-1) and H<sub>2</sub>O-forming (NOX-2), respectively [6]. NOX-1 catalyzes the two-electron reduction of O<sub>2</sub> by NADH, while NOX-2 catalyzes the four-electron reduction of O<sub>2</sub> by NADH [6]. There are low homology of deduced amino acid sequence between the NOX-1 and NOX-2 [7, 8]. NOX-2 is an integrant enzyme for the NAD<sup>+</sup> regeneration during aerobic mannitol metabolism, acts an important role in aerobic energy metabolism in O<sub>2</sub>-tolerant *Streptococcus mutans* and maintaining the balance of NAD<sup>+</sup>/NADH, while the NOX-1 contributes negligibly [3].

**Competing Interests:** The authors have declared that no competing interests exist.

Species specific codon usage change is often considered one of the foremost causes impacting protein expression levels [9, 10]. Variations in codon usage between species is key factor for the influence of recombinant protein expression levels. Codon optimization influences on the speed of translation, in turn, changes the structure and function of proteins, and the efficiency of the protein refolding recovered from inclusions [11–13]. Codon-optimized genes strategy has a significant impact on the industrial enzyme production and different codon optimization methods have served in the past ten years [9, 14–21].

Glycerol dehydrogenases (GDHs) play crucial roles in the pathway of glycerol metabolism for the production of dioxycetone (DHA) and 1, 3-propanediol (1, 3-PD). GDHs are also widely used in medical diagnosis and glycerol concentration analysis in fermentation process [22, 23]. Coupling with NADH oxidases, glycerol dehydrogenase catalyzes glycerol to dioxycetone with  $\text{NAD}^+$  regeneration, which overcome the disadvantage of expensive consumption of  $\text{NAD}^+$  (Fig 1). Based on end-to-end fusion technique, many fusion enzymes have been developed [24, 25], which obtained enhanced catalysis efficiency.

Firstly, comparative research of the two codon optimization strategies were used to improve the expression level of the NOX by optimizing the gene nox encoding NOX from *Lactobacillus brevis* ATCC 367 (*L. brevis* ATCC 367). First codon optimization strategy improved the AT content of 2–6 codons downstream of the gene initiation codon and the second codon optimization strategy rearranged NOX coding sequence to keep the codon usage frequency consistent with the *E. coli* BL21 (DE3) codon usage frequency. To our knowledge, this is the first report to improve the NOX expression by codon optimization strategies. Secondly, gene fusion of GDH-NOX bienzyme complex by splicing overlap extension PCR (SOE-PCR) was carried out. Kinetic parameters of GDH-NOX for each substrate, glycerol and NADH were investigated. Bioconversion of glycerol into dioxycetone coupled with coenzyme regeneration has a promising prospect of application for glycerol analysis and DHA production.

## Material and Methods

### Bacterial strains, plasmids, and reagents

The strain *L. brevis* ATCC 367 was obtained from the Institute of Microbiology of the Chinese Academy of Sciences. The strain *K. pneumoniae* DSM2026 was obtained from Doctor An-Ping Zeng (Hamburg University of Technology). *E. coli* DH5 $\alpha$  was used as host strains for cloning. BL21 (DE3) was used as host strains for expression. Plasmid pET-32a(+) was employed as an expression vector.

All enzymes, such as restriction endonucleases, T4 DNA ligase and Ex *Taq* DNA, were recruited from TaKaRa Co., Ltd. (Dalian, China). PrimeSTAR HS DNA Polymerase, Ligation solution I, Agarose Gel DNA Purification Kit Ver 2.0, Mutan BEST Kit, Agarose Gel DNA

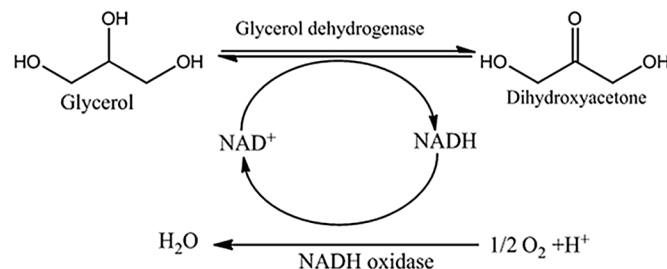

**Fig 1. Bioconversion of glycerol by fused glycerol dehydrogenase and NADH oxidase coupled with NADH regeneration.**

doi:10.1371/journal.pone.0128412.g001

**Table 1. Oligonucleotide primers used in this study.**

| Primers      | 5' to 3'                                 |
|--------------|------------------------------------------|
| <i>noxP1</i> | CGGGATCCATGAAAGTCACAGTTGTTGG             |
| <i>noxP2</i> | CCGCTCGAGAGCGTTAACTGATTGGG               |
| PT01         | TAACTGTTGTAGGTTGTACACATGCC               |
| PT02         | TAAACAGTTGTTGGTTGTACACATGCC              |
| PT03         | TAAACAGTTGTAGGTTGTACACATGCC              |
| PT04         | TAACTGTAGTAGGTTGTACACATGCC               |
| PT05         | TAACTGTAGTTGGTTGTACACATGCC               |
| PT06         | TTACAGTAGTTGGTTGTACACATGCC               |
| PT07         | TTACTGTAGTAGGTTGTACACATGCC               |
| PT08         | TAAACAGTAGTTGGTTGTACACATGCC              |
| P            | CTTTCATGGATCCGATATCAGCCATG               |
| P1           | CGGGATCCATGCTAAAAGTTATTCAATCTCC          |
| P2           | CCAACAACGTGTGACTTTCATACGCGCCAGCCACTGCTGG |
| P3           | CCAGCAGTGGCTGGCGGTATGAAAGTCACAGTTGTTGG   |
| P4           | CCGCTCGAGAGCGTTAACTGATTGGG               |

doi:10.1371/journal.pone.0128412.t001

Fragment Recovery Kit Ver.2.0 and pMD18-T were obtained from TaKaRa Co., Ltd. (Dalian, China). GeneRuler Ladder Mix was purchased from MBI Co. All other chemicals used were analytically graded and were purchased from either Sigma China or Omega China.

### Gene cloning and recombinant plasmid construction

The *nox* gene (Gene ID: CP000416) was cloned by the polymerase reaction (PCR) in the following three steps: (i) an initial denaturation step at 95°C for 5 min; (ii) 30 cycles of amplification (denaturation at 95°C for 1 min, annealing at 63°C for 50s and extension at 72°C for 2 min); and (iii) a final extension at 72°C for 10 min, with the forward and reverse primers (*noxP1* and *noxP2*, Table 1) containing *Bam*HI and *Xho*I sites (underlined), respectively. The purified PCR products by gel purification were treated with *Bam*HI and *Xho*I before reassembled into expression vector pET-32a(+), generating pET-32a-*nox*. Then the recombinant plasmids were transformed into competent *E. coli* DH5 $\alpha$  and cultivated at 37°C. The recombinant plasmids were sequenced and the positive recombinant plasmids were transformed into BL21 (DE3) for protein expression.

### Expression and purification of the NOX

The transformant was selected from a single colony, and grown overnight at 37°C in LB medium (ampicillin 100  $\mu$ g/mL). Subsequently, the culture was inoculated into fresh LB medium (1:100 dilution, containing 100  $\mu$ g/mL ampicillin), at 37°C. At an optical density (OD600) of 0.5–0.6, IPTG was added to a final concentration of 1.0 Mm, and the mixture was incubated at 37°C. Then, cells were harvested for enzyme assay. Cell free extract was obtained by the follow steps: the induced restructuring cell was centrifuged 10 min at 1°C, 8000 g/min, before being disrupted using a French cell press at 20,000 psi cell pressure; the cell lysate was centrifuged at 12,000 rpm for 10 min at 4°C, and the supernatant was collected. Then his-tagged enzymes were purified by using HisTrap HP column.

## Enzyme assay and biochemical characterization of the NOX

The NOX activity was determined at 37°C by monitoring the oxidation of NADH at 340 nm as described previously [26], with modification. The principle is based on that NOX can catalyze NADH to H<sub>2</sub>O, and the NADH which can be detected by spectrophotometer at 340 nm. 1 ml of the reaction system was consisted of of GDH, 0.2 mM NADH, 0.035 mol/L potassium phosphate buffers. The optimum pH of the NOX was determined at 37°C in different buffers with pH ranging from 3 to 10. The optimum operation time was determined by comparison of NOX activity with different operation time (6, 8, 10 and 12 min). The NOX activity with different inducing time (1, 2, 4, 6, 8h) was compared in order to determine the optimum inducing time.

Kinetic parameters,  $V_m$  and  $K_m$  of the purified NOX, were determined by measuring the enzyme activity with the substrate concentration of 20, 40, 80, 100, 200 and 400  $\mu$ M, at the optimum pH and temperature. One unit of NOX activity is defined as the amount of enzyme needed to catalyze the reduction of 1  $\mu$ mol of NADH per min under standard conditions. The data of the activity of NOX was detected under the standard method.

## Gene design, synthesis and expression vector construction

**Codon optimization by site directed mutagenesis.** It had been showed that the open reading frame (ORF) initiation codon downstream area (DB) can effectively affect the translation efficiency of prokaryote and optimizing the content of the AT in this region can effectively improve the level of gene expression [27]. This method would be improving the expression efficiency of the NOX in host cells. In this paper, the synonymous codon mutation was implemented during the third and sixth codon of the *nox*, and the content of the AT increase from 66.7% (the wild type) to 73.3% (the mutant strain). Using the pET-32a-*nox* as template, site directed mutagenesis mutants were obtained by PCR using 8 kinds of mutation primers (PT01-08, Table 1) and 1 kind of downstream primers P (Table 1) under the following conditions: 1 cycle at 94°C for 1 min; 30 cycles at 98°C for 10 s, 59°C for 15 s and 72°C for 8 min; and 1 final additional cycle at 72°C for 10 min. The resulting PCR product was gel-purified, then connected through ligation solution I in vitro and transformed into the BL21 (DE3). The recombinant plasmids were verified by DNA sequencing, and successfully introduced desired mutations were designated as T01-08.

**Codon optimization and redesign of the NOX.** Based on the codon usage of *E. coli* (<http://www.kazusa.or.jp/codon>), the full sequence of the *nox* was redesigned without changing the amino acid sequence in order to improve the expression level of the NOX in BL21 (DE3). Codon usage of wild type and optimized genes was showed in Table 2. According to the codon usage frequency, put the give priority codes in front of the gene, namely as the length of the gene codon usage frequency from high to low, that it is helpful to improve the efficiency of translation [28]. The optimized gene (Nox-opt) was synthesized by Sangon Biotech and cloned into the pET-32a(+), generating opt-*nox*.

**Enzyme assay of the T01-08 and the opt-nox.** Enzyme activity can be invoked as a measure index of recombinant protein expression level [29]. So, the change in amount of protein expression could be determined by detected the activity of the T01-08 and the opt-*nox*. After incubated by IPTG, his-tagged enzymes were purified by using HisTrap HP column.

**Fusion enzyme gene construction.** The *gdh* gene, from *K. pneumoniae* DSM2026, was cloned by the PCR in the following three steps: (i) an initial denaturation step at 95°C for 1 min; (ii) 30 cycles of amplification (denaturation at 95°C for 30s, annealing at 60°C for 30s and extension at 72°C for 2 min); and (iii) a final extension at 72°C for 10 min, with the forward and reverse primers (P1 and P2, Table 1) containing *Bam*HI sites in the forward primer

Table 2. Codon usage of wild type and optimized genes.

| AA  | Codon | Codon usage of <i>E. coli</i> B |           | Wild type |           | Optimized |           |
|-----|-------|---------------------------------|-----------|-----------|-----------|-----------|-----------|
|     |       | Number                          | Frequency | Number    | Frequency | Number    | Frequency |
| Gly | GGA   | 3                               | 0.1       | 3         | 0.11      | 3         | 0.1       |
|     | GGT   | 9                               | 0.3       | 15        | 0.54      | 9         | 0.3       |
|     | GGC   | 11                              | 0.41      | 6         | 0.21      | 11        | 0.41      |
|     | GGG   | 5                               | 0.18      | 4         | 0.14      | 5         | 0.18      |
| Ala | GCA   | 10                              | 0.21      | 11        | 0.23      | 10        | 0.21      |
|     | GCT   | 7                               | 0.15      | 15        | 0.32      | 7         | 0.15      |
|     | GCC   | 13                              | 0.28      | 13        | 0.28      | 13        | 0.28      |
| Val | GCG   | 17                              | 0.36      | 8         | 0.17      | 17        | 0.36      |
|     | GTA   | 5                               | 0.14      | 1         | 0.03      | 5         | 0.14      |
|     | GTT   | 9                               | 0.25      | 16        | 0.44      | 9         | 0.25      |
|     | GTC   | 6                               | 0.18      | 13        | 0.36      | 6         | 0.18      |
| Leu | GTG   | 16                              | 0.43      | 6         | 0.17      | 16        | 0.43      |
|     | TTA   | 5                               | 0.14      | 13        | 0.34      | 5         | 0.14      |
|     | TTG   | 6                               | 0.15      | 4         | 0.11      | 6         | 0.15      |
|     | CTA   | 1                               | 0.03      | 7         | 0.18      | 0         | 0.00      |
|     | CTT   | 4                               | 0.11      | 3         | 0.08      | 4         | 0.11      |
| Ile | CTC   | 5                               | 0.12      | 7         | 0.18      | 5         | 0.12      |
|     | CTG   | 17                              | 0.45      | 4         | 0.11      | 18        | 0.48      |
|     | ATA   | 2                               | 0.07      | 0         | 0.00      | 0         | 0.00      |
|     | ATT   | 14                              | 0.48      | 18        | 0.64      | 16        | 0.55      |
| Met | ATC   | 12                              | 0.44      | 10        | 0.36      | 12        | 0.44      |
|     | ATG   | 13                              | 1.00      | 13        | 1.00      | 13        | 1.00      |
| Phe | TTT   | 8                               | 0.61      | 10        | 0.77      | 8         | 0.61      |
|     | TTC   | 5                               | 0.39      | 3         | 0.23      | 5         | 0.39      |
| Tyr | TAT   | 12                              | 0.69      | 7         | 0.41      | 12        | 0.69      |
|     | TAC   | 5                               | 0.31      | 10        | 0.59      | 5         | 0.31      |
| Trp | TGG   | 2                               | 1.00      | 2         | 1.00      | 2         | 1.00      |
| Ser | TCA   | 2                               | 0.11      | 9         | 0.35      | 2         | 0.11      |
|     | TCT   | 4                               | 0.15      | 8         | 0.31      | 4         | 0.15      |
|     | TCC   | 4                               | 0.14      | 1         | 0.04      | 4         | 0.14      |
|     | TCG   | 5                               | 0.2       | 1         | 0.04      | 5         | 0.2       |
|     | AGT   | 4                               | 0.16      | 4         | 0.15      | 4         | 0.16      |
| Pro | AGC   | 7                               | 0.25      | 3         | 0.11      | 7         | 0.25      |
|     | CCA   | 4                               | 0.18      | 6         | 0.3       | 4         | 0.18      |
|     | CCT   | 3                               | 0.14      | 4         | 0.2       | 3         | 0.14      |
|     | CCC   | 1                               | 0.06      | 5         | 0.25      | 0         | 0.00      |
| Thr | CCG   | 12                              | 0.61      | 5         | 0.25      | 13        | 0.67      |
|     | ACA   | 4                               | 0.11      | 6         | 0.18      | 4         | 0.11      |
|     | ACT   | 5                               | 0.14      | 11        | 0.32      | 5         | 0.14      |
|     | ACC   | 16                              | 0.47      | 9         | 0.26      | 16        | 0.47      |
| Cys | ACG   | 9                               | 0.27      | 8         | 0.24      | 9         | 0.27      |
|     | TGT   | 2                               | 0.42      | 2         | 0.42      | 2         | 0.42      |
| Asn | TGC   | 3                               | 0.58      | 3         | 0.58      | 3         | 0.58      |
|     | AAT   | 13                              | 0.57      | 8         | 0.35      | 13        | 0.57      |
|     | AAC   | 10                              | 0.43      | 15        | 0.65      | 10        | 0.43      |

(Continued)

Table 2. (Continued)

| AA  | Codon | Codon usage of <i>E. coli</i> B |           | Wild type |           | Optimized |           |
|-----|-------|---------------------------------|-----------|-----------|-----------|-----------|-----------|
|     |       | Number                          | Frequency | Number    | Frequency | Number    | Frequency |
| Gln | CAA   | 7                               | 0.35      | 19        | 0.9       | 7         | 0.35      |
|     | CAG   | 14                              | 0.65      | 2         | 0.1       | 14        | 0.65      |
| Lys | AAA   | 17                              | 0.77      | 12        | 0.55      | 17        | 0.77      |
|     | AAG   | 5                               | 0.23      | 10        | 0.45      | 5         | 0.23      |
| His | CAT   | 6                               | 0.56      | 5         | 0.5       | 6         | 0.56      |
|     | CAC   | 4                               | 0.44      | 5         | 0.5       | 4         | 0.44      |
| Arg | CGA   | 1                               | 0.05      | 1         | 0.08      | 0         | 0.00      |
|     | CGT   | 4                               | 0.35      | 3         | 0.25      | 5         | 0.4       |
|     | CGC   | 5                               | 0.4       | 2         | 0.17      | 5         | 0.4       |
|     | CGG   | 1                               | 0.11      | 5         | 0.42      | 2         | 0.2       |
|     | AGA   | 1                               | 0.05      | 1         | 0.08      | 0         | 0.00      |
|     | AGG   | 0                               | 0.04      | 0         | 0.00      | 0         | 0.00      |
| Asp | GAT   | 23                              | 0.66      | 25        | 0.71      | 23        | 0.66      |
|     | GAC   | 12                              | 0.34      | 10        | 0.29      | 12        | 0.34      |
| Glu | GAA   | 12                              | 0.62      | 17        | 0.85      | 12        | 0.62      |
|     | GAG   | 8                               | 0.38      | 3         | 0.15      | 8         | 0.38      |

doi:10.1371/journal.pone.0128412.t002

(underlined). The *nox* gene was obtained by the same method, with the forward and reverse primers (P3 and P4, Table 1) containing *Xho*I sites in the reverse primer (underlined). The PCR products were purified, generating the template of the overlapping PCR (SOE-PCR). The fusion gene, *gdh-nox*, was obtained by SOE-PCR using P1 and P4 primers with the following steps: 1 cycle at 95°C for 1 min; 30 cycles at 98°C for 10 s, 60°C for 15 s and 72°C for 3 min; and 1 final additional cycle at 72°C for 10 min. The purified PCR products were addressed with *Bam*HI and *Xho*I before reassembled into expression vector pET-32a (+), generating pET-32a-*gdh-nox*. The recombinant plasmids were sequenced and the positive recombinant plasmids were transformed into BL21 (DE3) for protein expression.

**Enzyme assay and biochemical characterization of the GDH-NOX.** The enzyme measurement system of the NOX was consisted of 0.2 mM NADH, 100  $\mu$ L buffers with different pH and a moderate amount of crude enzyme. The activity of the GDH was determined by adding moderate crude enzyme under the following conditions: 30 mM (NH<sub>4</sub>)<sub>2</sub>SO<sub>4</sub>, 0.2 M glycerol, 2 mM NAD<sup>+</sup> and 0.1 M buffer with different pH [30]. To determine optimal temperatures for the NOX and GDH activities, the fusion enzyme was assayed at the gradient temperatures of 25–55°C in the above reaction system. The fusion enzyme solution for the reaction was adjusted to pH 5.0–12.0 to detect optimal pH for the NOX and GDH. The *V<sub>m</sub>* and *K<sub>m</sub>* toward glycerol and NADH of the GDH-NOX were determined by measuring the enzyme activity with the glycerol substrate (concentration of 0.01, 0.125, 0.014, 0.025 and 0.05 M) and the NADH substrate (concentration of 20, 40, 60, 100 and 200  $\mu$ M) respectively, at the optimum conditions.

**DHA biosynthesis.** After activation, the strains were inoculated in 200 mL LB medium (1:100 dilution, containing 100  $\mu$ g/mL ampicillin), and grown at 37°C for 2 h. At an OD<sub>600</sub> of 0.5–0.6, IPTG was added to a final concentration of 1.0 mM, and the mixture was incubated at 37°C for 4h. Then, cells were harvested for catalytic glycerol producing DHA. According to per 1g thallus 10 mL buffers, the cell free extract was obtained. The catalytic reaction experiments,

which were used to explore the productivity of pET-32-*nox*, pET-32-*gdh* and pET-32-*gdh-nox* in DHA production, were implemented with 10 g/L glycerol as substrate.

Glycerol concentration was quantified by a colorimetric method at 450nm as described previously [31], and the principle is based on that acidic periodate oxidation sugar alcohol produce formaldehyde, generated under Nash reagent in yellow compounds, the compounds have the largest under 450 nm absorption peak, and the depth of the color and glycerin concentration is proportional, the glycerin concentration can be quantitatively by colorimetric method. Using the ability of reducing, the content of DHA can be determined by colorimetric method which was described in the paper [32], the principle is that DHA has a reducing activity, under the condition of boiling, can react with phosphor molybdate reagent, generate molybdenum blue, make the solution is blue, the color depth is proportional to the concentration of DHA.

## Results

### Gene cloning, expression, purification and NOX characterization

The *nox* gene (1353 bp) encoding a polypeptide of 457 amino acids was obtained with a deduced molecular mass of 48.9 kDa. A single band of the purified NOX was showed in SDS—PAGE picture (Fig 2a). Optimal pH was 7.0 (Fig 2b). NOX demonstrated the highest specific activity of 28.9 U/mg after 4 h induction (Fig 2c). Kinetic parameters,  $K_m$  and  $V_{max}$ , were calculated as 62.6  $\mu$ M and 5.99  $\mu$ M/min, respectively (Fig 3).

### Gene design, synthesis and expression vector construction

The first optimization strategy was based on improving the AT content of 2–6 codons downstream of the initiation codon. The mutants (T01-08) were obtained by site directed mutagenesis and expressed in BL21 (DE3). Comparison of mutation sites with the wild-type was showed

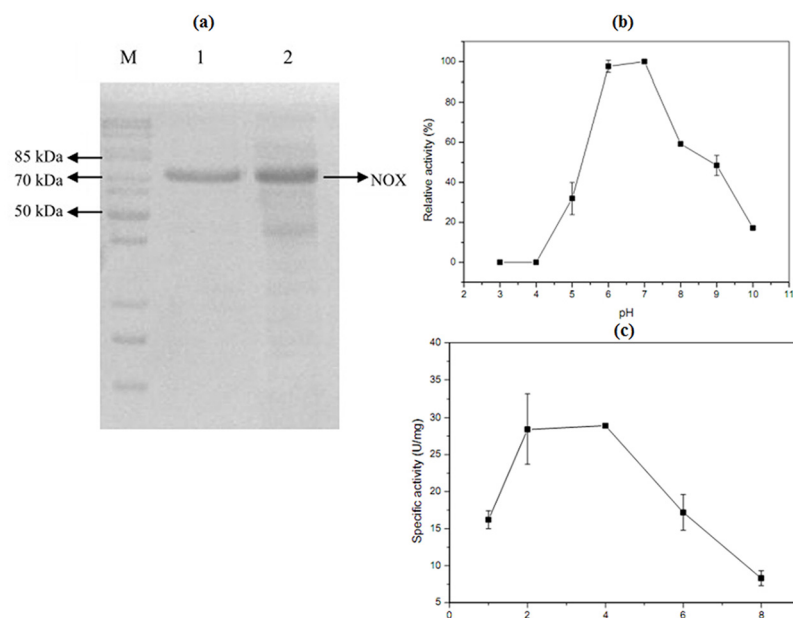

**Fig 2. Characterization of the NOX and SDS-PAGE analysis of the purified NOX.** (a) 10% SDS-PAGE analysis of the purification NOX. Lane M: protein marker; Lane 1: purified NOX with His-tag; Lane 2: recombinant bacterium (harboring pET-32a-*nox*) induced by IPTG. (b) Optimal pH for NOX. (c) The optimal inducing time of NOX.

doi:10.1371/journal.pone.0128412.g002



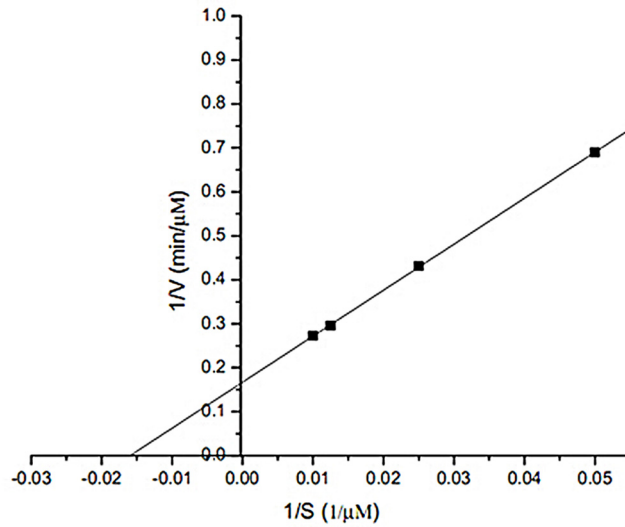

**Fig 3. Double reciprocal plot for  $K_m$  and  $V_{max}$  of NOX.** Experiment condition: NADH concentration (20, 40, 60, 100, 200  $\mu\text{M}$ ), pH 7.0, 37°C.

doi:10.1371/journal.pone.0128412.g003

in Table 3. For the second optimization strategy, gene sequence was rearranged for keep the codon usage frequency consistent with the *E. coli* BL21 (DE3) codon usage frequency. The optimized NOX gene (Nox-opt) was synthesized according to the codon optimization scheme and its sequence comparison with wild-type sequence was showed in Fig 4. Codon adaptation index (CAI) of the optimized sequence of the Nox-opt was 0.53, which was calculated by Codon-Adaptation Tool [33], was higher than that of the wild type (0.39), suggesting the optimized Nox-opt would be better in the expression in the host cell.

### Enzyme activity of the T01-08 and the opt-nox

Optimum inducing time of the mutant strains T01-08 was determined by comparison of T01-08 activities with different inducing time (1, 2, 4, 6, 8h). It could be noted that the T01-08 exhibited the highest activities after 4 h induction (Fig 5a), which was showed in Table 3. Increasing AT content in mutation area, the specific activity improved. NOX activity in cell extract of the mutants was 59.9 U/mg, which was 2.0-folds of the wild type (28.9 U/mg).

**Table 3. Sequences of the third to sixth codons and the Nox activities.**

| Name | AT-content in the third to sixth codons (%) | Sequence of the third to sixth codons | Nox specific activity (U/mg) |
|------|---------------------------------------------|---------------------------------------|------------------------------|
| wild | 58.3                                        | GTCACAGTTGTT                          | 28.9 ± 0                     |
| T01  | 66.7                                        | GTA <u>ACT</u> GTTGTA                 | 27.9 ± 1.6                   |
| T02  | 66.7                                        | GTAACAGTTGTT                          | 38.5 ± 0.7                   |
| T03  | 66.7                                        | GTAACAGTTGTA                          | 40.2 ± 1.2                   |
| T04  | 66.7                                        | GTA <u>ACT</u> GTA <u>GT</u> T        | 41.3 ± 3.4                   |
| T05  | 66.7                                        | GTA <u>ACT</u> GTA <u>GT</u> A        | 47.2 ± 0.5                   |
| T06  | 66.7                                        | GTT <u>ACT</u> GTA <u>GT</u> A        | 49.1 ± 8.1                   |
| T07  | 66.7                                        | GTAACAGT <u>AG</u> T                  | 54.5 ± 0.4                   |
| T08  | 66.7                                        | GTT <u>AC</u> AGT <u>AG</u> T         | 59.9 ± 4.9                   |

Note: Mutation sites was underlined.



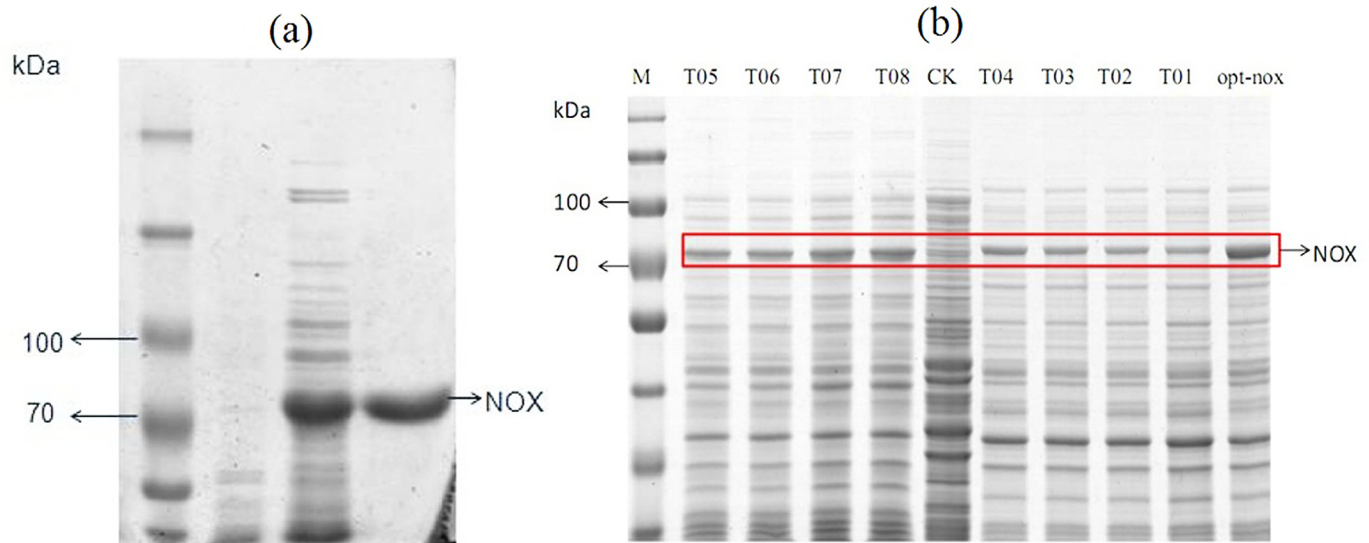

**Fig 4. Alignment of wild type nucleotide sequence (*nox*) with the optimized sequence (*Nox-opt*).** Identical residues were highlighted in black background.

doi:10.1371/journal.pone.0128412.g004

*Opt-nox* activities with different inducing time (1, 2, 4, 6, 8 h) were compared in order to determine the optimum inducing time (Fig 5b). NOX activity in cell extract of the *opt-nox* was 73.3 U/mg after 2 h induction, and it was 2.5-folds of the wild type. Then his-tagged *opt-nox* was purified by using HisTrap HP column (Table 4) and the specific activity of the purified enzyme was 213.8 U/mg. Purified *opt-nox* showed a single band in 10% SDS-PAGE (Fig 6a). SDS-PAGE was used to analyze the quantity of NOX in order to exhibit the improvement of

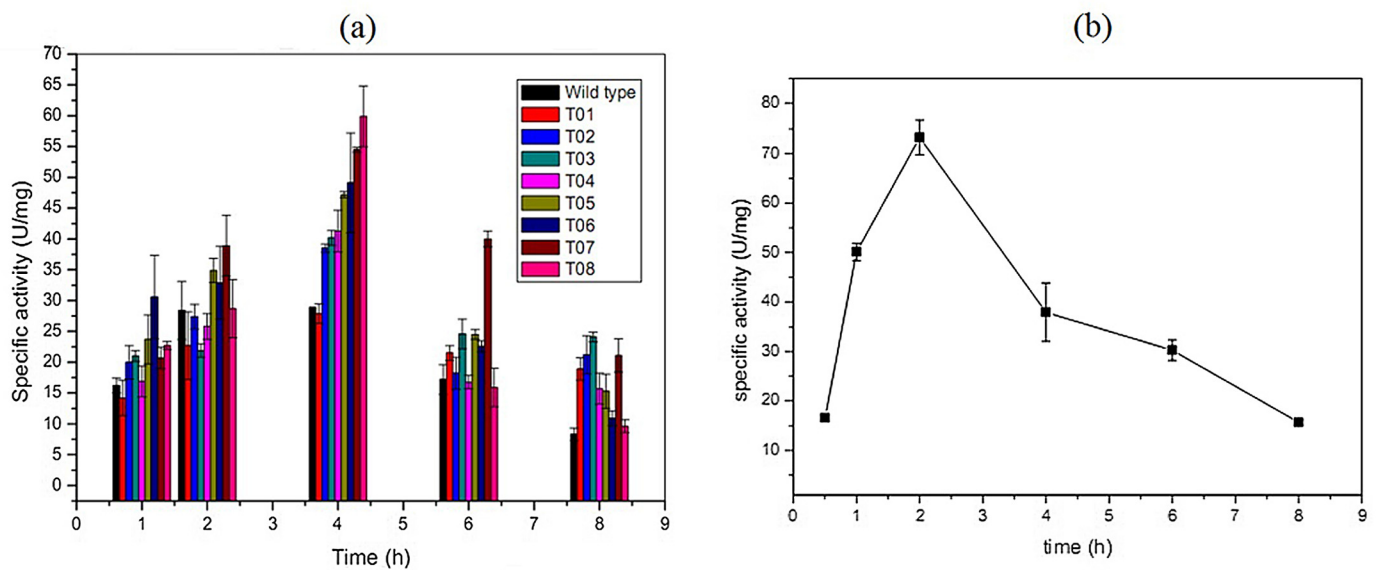

**Fig 5. Optimal induce time of the T01-08, *opt-nox* and the wild type.** (a) Comparison of the specific activity of the T01-08 and the wild type with different induced time (1–8h). (b) Optimal inducing time of the *opt-nox*.

doi:10.1371/journal.pone.0128412.g005

**Table 4. Specific activities of the opt-*nox* in the process of purification.**

| Purification step | Activity (U/mL) | Protein concentration(mg/mL) | Specific activity(U/mg) | Purification fold |
|-------------------|-----------------|------------------------------|-------------------------|-------------------|
| Cell extract      | 76.2            | 1.04                         | 73.3                    | 1                 |
| Histrap HP        | 38.5            | 0.18                         | 213.8                   | 2.9               |

doi:10.1371/journal.pone.0128412.t004

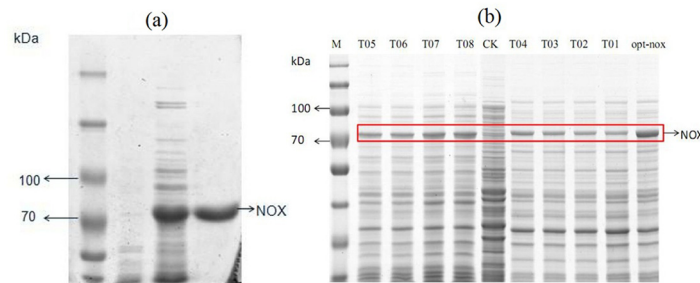

**Fig 6. Purification of NOXs and characterization of the optimized opt-*nox* expression levels by SDS-PAGE.** (a) 10% SDS-PAGE analysis of the purification opt-*nox*. M: protein marker; Lane 1: bacterium (harboring pET-32a) induced by IPTG; Lane 2: recombinant bacterium (harboring pET-32a-opt-*nox*) induced by IPTG; Lane 3: purified opt-*nox* with His-tag. (b) Expression levels of optimized NOXs in BL21 (DE3) were analyzed by 10% SDS-PAGE. Lane M: molecular mass markers. Lane CK: BL21 (DE3) without *nox* gene. Lane T01 to T08 are different mutations. Lane opt-*nox*: the whole optimization of the *nox* sequence.

doi:10.1371/journal.pone.0128412.g006

the protein expression level (Fig 6b), which demonstrated that protein expression amount and specific activity presented certain positive correlation.

### Fusion of the GDH-NOX

The full-length sequence of the fusion *gdh-nox* gene was obtained. The enzymes were purified by using HisTrap HP column and SDS-PAGE showed a band of the purified GDH-NOX with His-tag (Fig 7). Among the bifunctional fused enzyme, the optimal pH for NOX was pH 7.0 while for the GDH was 11.0 (Fig 8a and 8b). The optimum temperature of the GDH and NOX among the GDH-NOX was 45°C and 37°C, respectively (Fig 8c and 8d). The specific activities of the GDH and NOX of the GDH-NOX were 15.1 U/mg and 15.7 U/mg, respectively. Kinetic parameters of the GDH-NOX for two substrates, glycerol and NADH, were calculated as  $V_{max(\text{Glycerol})}$  20  $\mu\text{M}/\text{min}$ ,  $K_{m(\text{Glycerol})}$  19.4 mM,  $V_{max(\text{NADH})}$  12.5  $\mu\text{M}/\text{min}$  and  $K_{m(\text{NADH})}$  51.3  $\mu\text{M}$ , respectively (Fig 9).

### Enzymatic synthesis of DHA

Bioconversion of glycerol to DHA by the cell extracts of the BL21 (DE3), pET-32-*nox*, pET-32-*gdh* and pET-32-*gdh-nox*, were implemented. Glycerol conversion rates were showed in Table 5, which indicated that glycerol conversion rates of the pET-32a-*gdh-nox* was found to be 3.5-folds and 8.6-folds of the pET-32a-*gdh* at 10 and 30min, respectively.

### Discussion

NOXs are key enzymes for the regulation of aerobic metabolism and regenerating  $\text{NAD}^+$  [3]. To reduce the cost of enzymes production, increasing NOX expression level by codon optimization is an effective strategy. Two strategies, high AT-content in the region adjacent to the initiation codon and codon usage of the whole gene sequence consistent with the host, have dramatically enhanced translation. NOX activity in the crude extract, 28.9 U/mg, was higher

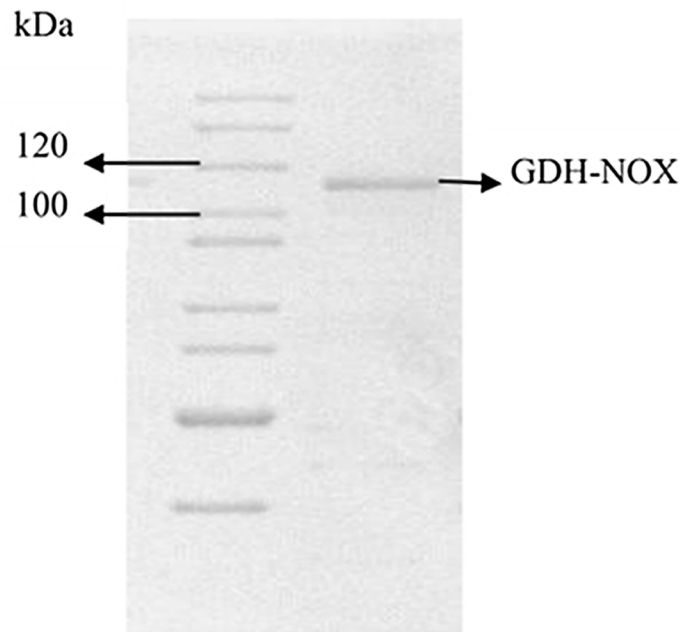

**Fig 7. 10% SDS-PAGE analysis of the purification fused GDH-NOX.** Line 1: protein marker; Lane 2: purified GDH-NOX with His-tag.

doi:10.1371/journal.pone.0128412.g007

than those NOXs from other *Lactobacillus* strains (*L. brevis* DSM 20 054, 10.6 U/mg; *L. kefir*, 5.4 U/mg; *L. casei*, 0.4 U/mg; *L. mesenteroides*, 0.5 U/mg) [34].

Due to fast growth rate, cheap fermentation media and clear genetics, *E. coli* is a preferred host for recombinant proteins production [15, 16]. The 5' coding region is the most sensitive to

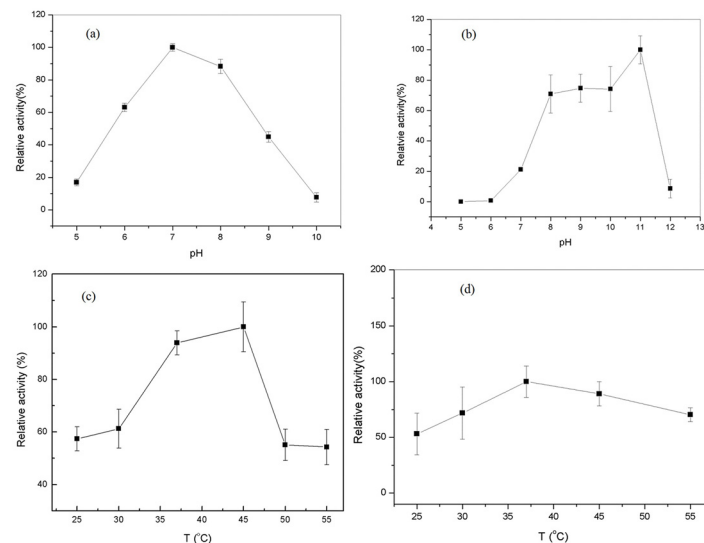

**Fig 8. Effects of pH and temperature on the activities of the GDH-NOX.** (a) optimal pH of NOX in GDH-NOX complex. (b) The optimal pH of GDH in GDH-NOX complex. (c) Optimal temperature for the NOX in the GDH-NOX complex. (d) Optimal temperature for the GDH in the GDH-NOX complex. NOX activity was tested with 0.2 mM NADH, 100  $\mu$ L buffers with different pH. GDH activity was determined under the following conditions: 30 mM  $(\text{NH}_4)_2\text{SO}_4$ , 0.2 M glycerol, 2 mM  $\text{NAD}^+$  and 0.1 M buffer with different pH.

doi:10.1371/journal.pone.0128412.g008

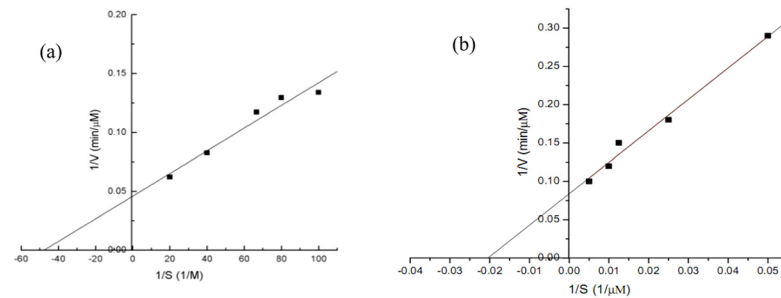

**Fig 9. Determination of kinetic parameters of GDH-NOX.** (a) Glycerol; (b) NADH. Experiment condition: glycerol concentration (0.01, 0.125, 0.014, 0.025, 0.05M), NADH concentration (20, 40, 60, 100, 200  $\mu$ M). pH 7.0, 37°C.

doi:10.1371/journal.pone.0128412.g009

codon usage for expression levels and particularly critical in modulating translation initiation [16, 35–38]. NOX activity of the gene with high AT-content in the region adjacent to the initiation codon by local optimization was 59.9 U/mg in cell extract. AT-rich content in the initiation codon downstream sequence improved the efficiency of protein translation, which may be through improving the structure of the mRNA, reduce the activation energy and easy to form translation starting compounds [27]. This positional effect is due to an effect on the stability of translation complexes near the beginning of a message [39].

To raise the protein expression level, the replacement of rare gene codes for optimal codon or increase the number of rare tRNA in the host [40] are applied. Codon optimization was used to enhance the F2 domain EBA-175 expression in both *E. coli* and *P. pastoris* [41]. NOX was synthesized according to *E. coli* codon usage and the CAI value was improved from 0.39 to 0.53. CAI value is between 0 and 1, the larger the more codon bias, which is used to predict the level of gene in heterologous hosts. NOX activity was up to 73.3 U/mg in cell extract when the gene sequence consistent with the host, which is almost 2.5-folds of the wild type. NOX activity of the purified opt-*nox* was 213.8 U/mg, which was 1.84-folds of the *L. brevis* DSM 20 054 (116 U/mg) [26]. Codon bias has been taken into account for efficient protein expression, reduced the metabolic load by reduced diversity of the isoacceptor tRNA for increasing the expression of a heterologous gene in a host [21, 35, 42]. The opt-*nox* showed the highest activity after induced 2 h while the optimum inducing time for pET-32a-*nox* was 4 h, which indicated the codon optimization could also save the inducing time (Fig 5).

Biocatalysis is green process for chemical synthesis on an industrial scale [43]. GDH was reported to be inactivated by oxidation under aerobic conditions [44–46].  $\text{NAD}^+$  is expensive and the generated reduced coenzyme NADH is the competitive inhibitor of  $\text{NAD}^+$  [23, 47]. Therefore, *in situ* recycling coenzyme can overcome those shortcomings. The GDH-NOX fusion protein was constructed by SOE-PCR. The  $V_{max}$  value of the GDH-NOX towards glycerol and NADH decreased, which may be due to the fusion protein generating space steric effect for the substrate. The C-terminal of the NOX fusion with the N-terminus of the GDH, may hinder the catalytic sites.

Bifunctional activities of GDH-NOX fusion enzyme could be enhanced by adding the peptide linkers, which separates the two enzymes at a reasonable distance. With optimized peptide linkers, the performance of the  $\beta$ -glucanase-xylanase fusion was enhanced [48]. The amount of glycerol can be measured in a few minutes (Table 5), suggesting the GDH-NOX bienzymes coupled with coenzyme regeneration system can be used to detect the glycerol concentration inside of red wine, human blood and on-line monitoring in fermentation process.

**Table 5. Bioconversion of glycerol by GDH and GDH-NOX.**

| Time (min) | Glycerol conversion rate (%) |         |
|------------|------------------------------|---------|
|            | GDH                          | GDH-NOX |
| 10         | 2.6                          | 19.6    |
| 30         | 3.7                          | 31.7    |

doi:10.1371/journal.pone.0128412.t005

## Conclusion

Codon optimization strategies were developed to enhance the NADH oxidase expression in *E. coli*. NOX activity of the *nox* gene with high AT-content in the region adjacent to the initiation codon and the *nox* gene sequence consistent with the host were 2.0 and 2.5-folds of the wild type, respectively. The fusion GDH-NOX with coenzyme regeneration has the potential application for glycerol analysis and enzymatic production of DHA.

## Acknowledgments

This work was supported by the National Natural Science Foundation of China (No. 41176111, No. 41306124), the State Key Program of the National Natural Science Foundation of China (No. 21336009), and the Fundamental Research Funds for the Central Universities (No. 2013121029).

## Author Contributions

Conceived and designed the experiments: SZW BSF. Performed the experiments: QZ. Analyzed the data: SZW WJ. Contributed reagents/materials/analysis tools: SZW QZ. Wrote the paper: SZW WJ.

## References

- Li N, Yi F-X, Spurrier JL, Bobrowitz CA, Zou A-P. Production of superoxide through NADH oxidase in thick ascending limb of Henle's loop in rat kidney. *Am J Physiol Renal Physiol*. 2002; 282(6):F1111–F9. PMID: [11997328](#)
- Park HJ, Reiser CO, Kondruwentit S, Erdmann H, Schmid RD, Sprinzl M. Purification and characterization of a NADH oxidase from the thermophile *Thermus thermophilus* HB8. *Eur J Biochem*. 1992; 205(3):881–5. PMID: [1577005](#)
- Higuchi M, Yamamoto Y, Poole LB, Shimada M, Sato Y, Takahashi N, et al. Functions of two types of NADH oxidases in energy metabolism and oxidative stress of *Streptococcus mutans*. *J Bacteriol*. 1999; 181(19):5940–7. PMID: [10498705](#)
- Warnholtz A, Nickenig G, Schulz E, Macharzina R, Bräsen JH, Skatchkov M, et al. Increased NADH-oxidase-mediated superoxide production in the early stages of atherosclerosis evidence for involvement of the renin-angiotensin system. *Circulation*. 1999; 99(15):2027–33. PMID: [10209008](#)
- Thannickal VJ, Fanburg BL. Activation of an HO-generating NADH Oxidase in Human Lung Fibroblasts by Transforming Growth Factor 1. *J Biol Chem*. 1995; 270(51):30334–8. PMID: [8530457](#)
- Higuchi M, Shimada M, Yamamoto Y, Hayashi T, Koga T, Kamio Y. Identification of two distinct NADH oxidases corresponding to H<sub>2</sub>O<sub>2</sub>-forming oxidase and H<sub>2</sub>O-forming oxidase induced in *Streptococcus mutans*. *J Gen Microbiol*. 1993; 139(10):2343–51. PMID: [8254304](#)
- Higuchi M, Shimada M, Matsumoto J, Yamamoto Y, Rhaman A, Kamio Y. Molecular cloning and sequence analysis of the gene encoding the H<sub>2</sub>O<sub>2</sub>-forming NADH oxidase from *Streptococcus mutans*. *Biosci Biotechnol Biochem*. 1994; 58(9):1603–7. PMID: [7765479](#)
- Matsumoto J, Higuchi M, Shimada M, Yamamoto Y, Kamio Y. Molecular cloning and sequence analysis of the gene encoding the H<sub>2</sub>O-forming NADH oxidase from *Streptococcus mutans*. *Biosci Biotechnol Biochem*. 1996; 60(1):39–43. PMID: [8824824](#)

9. Zhou Z, Schnake P, Xiao L, Lal AA. Enhanced expression of a recombinant malaria candidate vaccine in *Escherichia coli* by codon optimization. *Protein Expr Purif.* 2004; 34(1):87–94. PMID: [14766303](#)
10. Villalobos A, Ness JE, Gustafsson C, Minshull J, Govindarajan S. Gene Designer: a synthetic biology tool for constructing artificial DNA segments. *BMC Bioinformatics.* 2006; 7(1):285.
11. Kimchi-Sarfaty C, Oh JM, Kim I-W, Sauna ZE, Calcagno AM, Ambudkar SV, et al. A "silent" polymorphism in the MDR1 gene changes substrate specificity. *Science.* 2007; 315(5811):525–8. PMID: [17185560](#)
12. Angov E, Hillier CJ, Kincaid RL, Lyon JA. Heterologous protein expression is enhanced by harmonizing the codon usage frequencies of the target gene with those of the expression host. *PLoS one.* 2008; 3(5):e2189. doi: [10.1371/journal.pone.0002189](#) PMID: [18478103](#)
13. Marin M. Folding at the rhythm of the rare codon beat. *Biotechnol J.* 2008; 3(8):1047–57. doi: [10.1002/biot.200800089](#) PMID: [18624343](#)
14. Menzella HG. Comparison of two codon optimization strategies to enhance recombinant protein production in *Escherichia coli*. *Microb Cell Fact.* 2011; 10:15. doi: [10.1186/1475-2859-10-15](#) PMID: [21371320](#)
15. Burgess-Brown NA, Sharma S, Sobott F, Loenarz C, Oppermann U, Gileadi O. Codon optimization can improve expression of human genes in *Escherichia coli*: A multi-gene study. *Protein Expr Purif.* 2008; 59(1):94–102. doi: [10.1016/j.pep.2008.01.008](#) PMID: [18289875](#)
16. Welch M, Govindarajan S, Ness JE, Villalobos A, Gurney A, Minshull J, et al. Design parameters to control synthetic gene expression in *Escherichia coli*. *PLoS one.* 2009; 4(9):e7002. doi: [10.1371/journal.pone.0007002](#) PMID: [19759823](#)
17. Kodumal SJ, Patel KG, Reid R, Menzella HG, Welch M, Santi DV. Total synthesis of long DNA sequences: synthesis of a contiguous 32-kb polyketide synthase gene cluster. *Proc Natl Acad Sci USA.* 2004; 101(44):15573–8. PMID: [15496466](#)
18. Wang X, Li X, Zhang Z, Shen X, Zhong F. Codon optimization enhances secretory expression of *Pseudomonas aeruginosa* exotoxin A in *E. coli*. *Protein Expr Purif.* 2010; 72(1):101–6. doi: [10.1016/j.pep.2010.02.011](#) PMID: [20172029](#)
19. Menzella HG, Reisinger SJ, Welch M, Kealey JT, Kennedy J, Reid R, et al. Redesign, synthesis and functional expression of the 6-deoxyerythronolide B polyketide synthase gene cluster. *J Ind Microbiol Biotechnol.* 2006; 33(1):22–8. PMID: [16187094](#)
20. Menzella HG, Carney JR, Santi DV. Rational design and assembly of synthetic trimodular polyketide synthases. *Chem Biol* 2007; 14(2):143–51. PMID: [17317568](#)
21. Gustafsson C, Govindarajan S, Minshull J. Codon bias and heterologous protein expression. *TRENDS Biotechnol.* 2004; 22(7):346–53. PMID: [15245907](#)
22. Sokic-Lazic D, Arechederra RL, Treu BL, Minter SD. Oxidation of biofuels: fuel diversity and effectiveness of fuel oxidation through multiple enzyme cascades. *Electroanalysis.* 2010; 22(7–8):757–64.
23. Lapenaite I, Ramanaviciene A, Ramanavicius A. Current trends in enzymatic determination of glycerol. *Crit Rev Anal Chem.* 2006; 36(1):13–25.
24. Trujillo M, Duncan R, Santi D. Construction of a homodimeric dihydrofolate reductase-thymidylate synthase bifunctional enzyme. *Protein Eng.* 1997; 10(5):567–73. PMID: [9215575](#)
25. Hong SY, Lee JS, Cho KM, Math RK, Kim YH, Hong SJ, et al. Assembling a novel bifunctional cellulase—xylanase from *Thermotoga maritima* by end-to-end fusion. *Biotechnol Lett.* 2006; 28(22):1857–62. PMID: [16988785](#)
26. Geueke B, Riebel B, Hummel W. NADH oxidase from *Lactobacillus brevis*: a new catalyst for the regeneration of NAD. *Enzyme Microb Technol.* 2003; 32(2):205–11.
27. Stenström CM, Jin H, Major LL, Tate WP, Isaksson LA. Codon bias at the 3'-side of the initiation codon is correlated with translation initiation efficiency in *Escherichia coli*. *Gene.* 2001; 263(1):273–84.
28. Li W, Ng I-S, Fang B, Yu J, Zhang G. Codon optimization of 1, 3-propanediol oxidoreductase expression in *Escherichia coli* and enzymatic properties. *Electronic Journal of Biotechnology.* 2011; 14(4):7-.
29. Nishikubo T, Nakagawa N, Kuramitsu S, Masui R. Improved heterologous gene expression in *Escherichia coli* by optimization of the AT-content of codons immediately downstream of the initiation codon. *J Biotechnol.* 2005; 120(4):341–6. PMID: [16140408](#)
30. Pandey A, Iyengar L. Chemical modification of specific active site amino acid residues of *Enterobacter aerogenes* glycerol dehydrogenase. *J Enzyme Inhib Med Chem.* 2002; 17(1):49–53. PMID: [12365461](#)
31. Zhang Y-s, Gao H, Wang Y-p. Determination of glycerol content in Clavulanic acid borth by Spectrophotometry. *Journal of Tianjin University of Science & Technology.* 2006; 21(1):15–7.



32. Wang J-f, Chen X-m, Zhao F. Determination of 1,3—dihydroxyacetone in acid glycerol solution by Molybdo-Phosphorus Blue-Photometry. *Physical Testing and Chemical Analysis Part B (Chemical Analysis)*. 2008; 43(9):764–5.
33. Sharp PM, Li W-H. The codon adaptation index—a measure of directional synonymous codon usage bias, and its potential applications. *Nucleic Acids Res*. 1987; 15(3):1281–95. PMID: [3547335](#)
34. Hummel W, Riebel B. Isolation and biochemical characterization of a new NADH oxidase from *Lactobacillus brevis*. *Biotechnol Lett*. 2003; 25(1):51–4. PMID: [12882306](#)
35. Vervoort EB, van Ravestein A, van Peij NN, Heikoop JC, van Haastert PJ, Verheijden GF, et al. Optimizing heterologous expression in *Dictyostelium*: importance of 5' codon adaptation. *Nucleic Acids Res*. 2000; 28(10):2069–74. PMID: [10773074](#)
36. Welch M, Villalobos A, Gustafsson C, Minshull J. You're one in a googol: optimizing genes for protein expression. *J R Soc Interface* 2009; 6(Suppl 4):S467–S76. doi: [10.1098/rsif.2008.0520.focus](#) PMID: [19324676](#)
37. Kudla G, Murray AW, Tollervey D, Plotkin JB. Coding-sequence determinants of gene expression in *Escherichia coli*. *Science*. 2009; 324(5924):255–8. doi: [10.1126/science.1170160](#) PMID: [19359587](#)
38. Stenström CM, Isaksson LA. Influences on translation initiation and early elongation by the messenger RNA region flanking the initiation codon at the 3' side. *Gene*. 2002; 288(1):1–8.
39. Goldman E, Rosenberg AH, Zubay G, Studier WF. Consecutive Low-usage Leucine Codons Block Translation Only When Near the 5' End of a Message in *Escherichia coli*. *J Mol Biol*. 1995; 245(5):467–73. PMID: [7844820](#)
40. Baca AM, Hol WG. Overcoming codon bias: A method for high-level overexpression of *Plasmodium* and other AT-rich parasite genes in *Escherichia coli*. *Int J Parasitol*. 2000; 30(2):113–8. PMID: [10704592](#)
41. Yadava A, Ockenhouse CF. Effect of codon optimization on expression levels of a functionally folded malaria vaccine candidate in prokaryotic and eukaryotic expression systems. *Infect Immun*. 2003; 71(9):4961–9. PMID: [12933838](#)
42. Andersson G, Kurland C. An extreme codon preference strategy: codon reassignment. *Mol Biol Evol* 1991; 8(4):530–44. PMID: [1921708](#)
43. Tufvesson Pr, Lima-Ramos J, Haque NA, Gernaey KV, Woodley JM. Advances in the process development of biocatalytic processes. *Org Process Res Dev*. 2013; 17(10):1233–8.
44. Forage RG, Foster MA. Glycerol fermentation in *Klebsiella pneumoniae*: functions of the coenzyme B12-dependent glycerol and diol dehydratases. *J Bacteriol*. 1982; 149(2):413–9. PMID: [7035429](#)
45. Johnson E, Levine R, Lin E. Inactivation of glycerol dehydrogenase of *Klebsiella pneumoniae* and the role of divalent cations. *J Bacteriol*. 1985; 164(1):479–83. PMID: [3900046](#)
46. Johnson E, Lin E. *Klebsiella pneumoniae* 1, 3-propanediol: NAD<sup>+</sup> oxidoreductase. *J Bacteriol* 1987; 169(5):2050–4. PMID: [3553154](#)
47. Ruzheinikov SN, Burke J, Sedelnikova S, Baker PJ, Taylor R, Bullough PA, et al. Glycerol dehydrogenase: structure, specificity, and mechanism of a family III polyol dehydrogenase. *Structure*. 2001; 9(9):789–802. PMID: [11566129](#)
48. Lu P, Feng MG. Bifunctional enhancement of a  $\beta$ -glucanase-xylanase fusion enzyme by optimization of peptide linkers. *Appl Microbiol Biotechnol*. 2008; 79(4):579–87. doi: [10.1007/s00253-008-1468-4](#) PMID: [18415095](#)
